1

2 **BceAB-type antibiotic resistance transporters appear to act by target**

3 **protection of cell wall synthesis**

4

5 Carolin M Kobras<sup>1</sup>, Hannah Piepenbreier<sup>2</sup>, Jennifer Emenegger<sup>3</sup>, Andre Sim<sup>2</sup>, Georg Fritz<sup>2,4</sup> and

6 Susanne Gebhard<sup>1,\*</sup>

7

8 <sup>1</sup>*Department of Biology & Biochemistry, Milner Centre for Evolution, University of Bath, United*

9 *Kingdom, <sup>2</sup>LOEWE Center for Synthetic Microbiology and Department of Physics, Philipps-Universität*

10 *Marburg, Germany, <sup>3</sup>Department Biologie I, Ludwig-Maximilians-Universität Munich, Germany.*

11 <sup>4</sup>*Present address: School of Molecular Sciences, The University of Western Australia, Perth, Western*

12 *Australia 6009, Australia.*

13

14 \*For correspondence: Phone: +44 1225 386421; E-mail: [s.gebhard@bath.ac.uk](mailto:s.gebhard@bath.ac.uk)

15

16

17 Running title: Target protection of the cell wall

18 Keywords: ABC transport, antimicrobial peptide, lipid II cycle, *Bacillus subtilis*

19

## 20 **ABSTRACT**

21 Resistance against cell wall-active antimicrobial peptides in bacteria is often mediated by  
22 transporters. In low GC-content Gram-positive bacteria, a wide-spread type of such transporters are  
23 the BceAB-like systems, which frequently provide a high level of resistance against peptide  
24 antibiotics that target intermediates of the lipid II cycle of cell wall synthesis. How a transporter can  
25 offer protection from drugs that are active on the cell surface, however, has presented researchers  
26 with a conundrum. Multiple theories have been discussed, ranging from removal of the peptides  
27 from the membrane, internalisation of the drug for degradation, to removal of the cellular target  
28 rather than the drug itself. To resolve this much-debated question, we here investigated the mode  
29 of action of the transporter BceAB of *Bacillus subtilis*. We show that it does not inactivate or import  
30 its substrate antibiotic bacitracin. Moreover, we present evidence that the critical factor driving  
31 transport activity is not the drug itself, but instead the concentration of drug-target complexes in the  
32 cell. Our results, together with previously reported findings, lead us to propose that BceAB-type  
33 transporters act by transiently freeing lipid II cycle intermediates from the inhibitory grip of  
34 antimicrobial peptides, and thus provide resistance through target protection of cell wall synthesis.  
35 Target protection has so far only been reported for resistance against antibiotics with intracellular  
36 targets, such as the ribosome. However, this mechanism offers a plausible explanation for the use of  
37 transporters as resistance determinants against cell wall-active antibiotics in Gram-positive bacteria  
38 where cell wall synthesis lacks the additional protection of an outer membrane.

## 39 INTRODUCTION

40 The bacterial cell wall and its biosynthetic pathway, the lipid II cycle, are important targets for  
41 antibiotics, especially in Gram-positive bacteria that lack the protective layer of the outer  
42 membrane. Cell wall-targeting drugs include antimicrobial peptides (AMPs), which bind to cycle  
43 intermediates and prevent biosynthetic enzymes from carrying out the next reaction (1). It is hardly  
44 surprising that bacteria have developed a plethora of strategies to protect themselves against such  
45 antibiotic attack. Among the many known resistance mechanisms, a common strategy is the  
46 production of ATP-binding cassette (ABC) transporters that presumably remove AMPs from their site  
47 of action (2, 3). A major group of these are the BceAB-type transporters, which are found in many  
48 environmental and pathogenic species of the phylum Firmicutes (4). The eponymous and to date  
49 best-characterised system is BceAB of *Bacillus subtilis* (5). BceAB-type transporters comprise one  
50 permease (BceB) and two ATPases (BceA) (BceA, 6). The permeases consist of ten transmembrane  
51 helices and a large extracellular domain that is thought to contain the ligand binding region of the  
52 transporter (7, 8). Transporter production is regulated via a two-component regulatory system (TCS)  
53 consisting of a histidine kinase (BceS) and a response regulator (BceR) (BceR, 5, 7). A striking feature  
54 of these systems is that signalling is triggered by the activity of the transporter itself (9). Due to this  
55 flux-sensing strategy, signalling is directly proportional to transport activity, and the transporter  
56 effectively autoregulates its own production (Fig. 1A).

57 BceAB confers resistance against the AMPs bacitracin, mersacidin, actagardine and plectasin, of  
58 which bacitracin binds the lipid II cycle intermediate undecaprenyl pyrophosphate (UPP), while the  
59 others bind lipid II itself (5, 8). Considering the location of the AMPs' targets on the extracellular side  
60 of the cytoplasmic membrane, it is not immediately obvious how a membrane-embedded  
61 transporter can provide effective protection from these drugs. The mode of action of BceAB-type  
62 transporters has therefore been the subject of much debate (Fig. 1A). When first described, the *B.*  
63 *subtilis* system was named Bce for bacitracin efflux (5), although no evidence for the direction of  
64 transport was available. The assumption of export was based on the suggested self-protection

65 mechanism of the unrelated transporter BcrAB in the bacitracin producer *B. licheniformis*  
66 ATCC10716 (10, 11). BcrAB was thought to work as a 'hydrophobic vacuum cleaner' to remove the  
67 antibiotic from the membrane, akin to the human multidrug resistance transporter P-glycoprotein  
68 (12, 13). Later, BceAB was speculated to instead import bacitracin into the cytoplasm for subsequent  
69 degradation, again without direct experimental evidence (7). More recently, the transporter was  
70 proposed to act as a UPP flippase (14). In this scenario, BceAB would confer resistance by  
71 transporting UPP across the membrane to the cytoplasmic face, thereby removing the cellular target  
72 for bacitracin rather than transporting bacitracin itself. In the presence of bacitracin, BceAB was  
73 hypothesised to be inhibited by UPP-bacitracin complexes (UPP-BAC), which in turn should activate  
74 signalling through the BceRS two-component system to adjust BceAB levels in the cell (14). This  
75 model offered a neat explanation of the available data on bacitracin resistance, but could not  
76 explain how the same transporter can confer resistance against AMPs that target lipid II instead of  
77 UPP.

78 Since then, we have shown that BceB is able to bind bacitracin *in vitro* (6). Without excluding the  
79 possibility of BceAB interacting with the UPP-BAC complex, this finding suggested that BceAB-like  
80 transporters directly interacted with the AMP and that the AMP is at least part of the physiological  
81 substrate. Moreover, the computational model used to establish the flux-sensing mechanism for  
82 signalling within the Bce system was based on recognition of UPP-BAC complexes by the transporter  
83 and removal of bacitracin from the complex (9). Although the model did not specify a particular  
84 direction of transport, such a mechanism was most in line with the initial hydrophobic vacuum  
85 cleaner hypothesis (5). Resistance in this scenario is conferred by BceAB recognising target-AMP  
86 complexes in the membrane, removing the antibiotic and releasing it into the extracellular milieu.  
87 This frees the target from the inhibitory action of the antibiotic and allows the next step of cell wall  
88 synthesis to proceed.

89 Considering the relevance of BceAB-like systems among Firmicutes bacteria, we here set out to  
90 address the controversial question on their mode of action and how a transporter can provide  
91 effective protection against cell surface-active antibiotics. Using a peptide release assay, we exclude  
92 that BceAB acts by import or inactivation of bacitracin. Based on the discovery that signalling within  
93 the Bce system is directly proportional to transport activity, we established a promoter-reporter  
94 assay as a proxy for transport activity. Our results show that the critical variable in determining  
95 transport activity of BceAB is bacitracin in complex with its cellular target UPP, rather than bacitracin  
96 or the lipid carrier alone. Taking together the findings of this study and the literature, we conclude  
97 that BceAB-type transporters appear to transiently free their cellular target from the inhibitory grip  
98 of the AMP and provide resistance via target protection of cell wall synthesis.

99

## 100 **METHODS**

### 101 **Bacterial strains and growth conditions.**

102 All strains used in this study are given in Table 1. *E. coli* and *B. subtilis* strains were routinely grown at  
103 37 °C with agitation (180 rpm) in lysogeny broth (LB) medium. Solid media contained 1.5% (w/v)  
104 agar. Selective media contained ampicillin (100 µg ml<sup>-1</sup>), chloramphenicol (5 µg ml<sup>-1</sup>), kanamycin (10  
105 µg ml<sup>-1</sup>), spectinomycin (100 µg ml<sup>-1</sup>), tetracycline (10 µg ml<sup>-1</sup>) or erythromycin (1 µg ml<sup>-1</sup>) with  
106 lincomycin (25 µg ml<sup>-1</sup>; macrolide-lincosamide-streptogramin B; mls). For full induction of the  
107 promoter P<sub>xyIA</sub>, xylose was added to a final concentration of 0.2 % (w/v). Bacterial growth was  
108 routinely monitored as optical density at 600 nm wavelength (OD<sub>600</sub>) measured  
109 spectrophotometrically in cuvettes of 1 cm light path length.

110

### 111 **Strain construction and molecular cloning.**

112 All plasmids used in this study are listed in Table 1; primer sequences are given in Table 2. *B. subtilis*  
113 transformations were performed using a modified version of the Paris protocol (15). Overnight

114 cultures of recipient strains were grown in 500  $\mu$ l Paris medium (6.1 mM  $K_2HPO_4$ , 4.4 mM  $KH_2PO_4$ ,  
115 0.4 mM trisodium citrate, 1 % (w/v) glucose, 20 mM potassium L-glutamate, 0.1 % (w/v) casamino  
116 acids, 3 mM  $MgSO_4$ , 25  $\mu$ g  $ml^{-1}$  tryptophan, 8  $\mu$ M ferric ammonium citrate) at 37 °C with aeration  
117 (180 rpm). Day cultures (500  $\mu$ l) were inoculated 1:50 in fresh, pre-warmed Paris medium and grown  
118 for three hours (37 °C, 180 rpm). To each culture, 50  $\mu$ l of isolated genomic DNA (gDNA) of the donor  
119 strain, or 0.5-1  $\mu$ g of isolated plasmid DNA were added. Transformation cultures were grown for five  
120 more hours and plated on selective media. For mls or chloramphenicol resistance, cultures were pre-  
121 induced for one hour at 1:40 of the final concentration of the respective antibiotic. Donor strain  
122 gDNA was isolated by mixing an overnight culture of the donor 1:1 with SC buffer (150 mM NaCl, 10  
123 mM sodium citrate, pH 7.0) and harvesting the cells by centrifugation (5 min, 1300  $\times$  g). The pellet  
124 was resuspended in SC buffer and incubated with lysozyme at 37 °C for 15 minutes. The solution was  
125 mixed 1:1 with 5 M NaCl and passed through a 0.45  $\mu$ m syringe-driven filter. Plasmid DNA was  
126 isolated from *E. coli* using conventional mini-prep kits.

127 To create a construct for inducible expression of *bcrC*, the gene was PCR-amplified from *B. subtilis*  
128 W168 using primers TM2731 and TM2732, which incorporated prefix and suffix, respectively, of the  
129 modified 'Freiburg standard' of BioBrick cloning described previously (16). The resulting fragment  
130 was cloned into pSB1A3 via the EcoRI and PstI restriction sites (pJNESB101). The *bcrC* gene was then  
131 re-excised using XbaI and PstI. Assembly with an EcoRI/SpeI fragment of the BioBrick carrying the  
132 xylose-inducible promoter  $P_{xyIA}$  (16) into EcoRI/PstI digested pBS2E resulted in the inducible  $P_{xyIA}$ -*bcrC*  
133 construct pJNE2E01. A transcriptional  $P_{psdA}$ -*lux* reporter construct (pSDlux102) was created by PCR  
134 amplification of the promoter region of *psdAB* of *B. subtilis* using primers TM0599 and TM2242, and  
135 ligation with pAH328 via EcoRI and NotI restriction sites. The existing  $P_{bceA}$ -*luxABCDE* reporter  
136 (pSDlux101; (17) was re-constructed in vector pBS3Elux (18), which contains an mls resistance  
137 marker instead of chloramphenicol. This was achieved by PCR amplification of the promoter  
138 fragment with primers SG843 and SG883, and cloning via EcoRI and PstI sites, resulting in plasmid  
139 pMG3Elux1.

140

141 **Determination of the minimal inhibitory concentration**

142 The susceptibility of *B. subtilis* strains to bacitracin was determined using the minimal inhibitory  
143 concentration (MIC) determined by broth micro-dilutions. For this, two-fold serial dilutions of Zn<sup>2+</sup>-  
144 bacitracin were prepared in 2 ml of Mueller-Hinton medium and inoculated 1:500 from overnight  
145 cultures grown in the same medium. For higher resolution, in some instances defined concentrations  
146 of Zn<sup>2+</sup>- bacitracin were added directly to each culture. Cultures were incubated overnight (37 °C,  
147 180 rpm) and examined for growth after 24 h. The MIC was determined as the lowest concentration  
148 at which no visible growth was detected. All experiments were performed in at least biological  
149 triplicates, and mean values and standard deviations were calculated to report the data.

150

151 **Bacitracin uptake assays**

152 Bacitracin uptake was assayed with slight modification to previously described protocols (19, 20).  
153 Overnight cultures were diluted 1:500 in 100 ml LB supplemented with 1 % (w/v) fructose. To induce  
154 BceAB production in the wild type, 1 µg ml<sup>-1</sup> bacitracin was added at the time of inoculation. The  
155 cultures were incubated for 3.5-4.75 h at 37 °C (200 rpm) until they reached an OD<sub>600</sub> of 1.0-2.0. Cells  
156 were harvested by centrifugation (4000 × g, 10 minutes, room temperature) and washed twice with  
157 50 mM potassium phosphate (pH 7-7.5) and 100 mM NaCl. Cell density was adjusted to an OD<sub>600</sub> of  
158 10 in assay buffer (50 mM potassium phosphate (pH 7-7.5), 100 mM NaCl, 1 % (w/v) fructose and 50  
159 µM zinc sulfate). Aliquots of 2.4 ml of the cell suspension were incubated for 10 minutes at 37°C  
160 (200 rpm). Bacitracin was added to a final concentration of 5 µg ml<sup>-1</sup>, followed by incubation for 30  
161 minutes at 37 °C (200 rpm). As control, one sample containing no cells received the identical  
162 treatment. Cells were removed by centrifugation (4000 × g, 10 minutes, room temperature) and the  
163 supernatants were filtered (0.45 µm). The supernatants were stored for no longer than five days at -

164 20 °C, and were concentrated 5-fold using an Eppendorf Concentrator 5301 speed vacuum at room  
165 temperature.

166 To quantify the bacitracin remaining in the culture supernatants, the sensitivity of the strain TMB713  
167 was exploited in a bioassay adapted from the method established by K. Okuda et al. (21). To this  
168 end, an overnight culture of TMB713, grown in LB with selective antibiotics, was diluted 1:30 into 3  
169 ml melted (60 °C) LB soft agar (0.75 % (w/v)) and poured evenly onto a dried LB agar plate, allowed  
170 to solidify 10 minutes at room temperature and then dried for 10 minutes. Plugs 6 mm in diameter  
171 were removed from the plate, leaving stable holes in the agar. In volumes of 50  $\mu$ l, bacitracin  
172 standards (5-50  $\mu$ g ml<sup>-1</sup>) and concentrated supernatants were applied into the holes and plates were  
173 immediately incubated upright at 37°C. After 24-26 hours, the diameter of the growth inhibition  
174 zone was measured. Clearing zones measured from bacitracin standards were used to create a  
175 standard curve. Bacitracin concentrations in supernatants were extrapolated using the standard  
176 curve and worked back to the original sample from the known 5-fold concentration factor during  
177 sample preparation.

178

### 179 **Computational model and simulations**

180 Model predictions for the data in figures 3 and 4 were performed with a previously established  
181 model for the lipid II cycle and its interaction with the bacitracin stress response network in *B.*  
182 *subtilis* (22, 23). Briefly, the model uses deterministic differential equations to describe the time-  
183 dependent concentrations of the different lipid II cycle intermediates, as well as the bacitracin stress  
184 response modules BcrC and BceAB. A detailed description of the model assumptions and equations  
185 for the bacitracin resistance network in *B. subtilis* wild type and the  $\Delta bcrC$  mutant has been laid out  
186 before (23). In the model for the  $\Delta bcrC$  mutant, a homeostatic up-shift in *de novo* synthesis of UPP  
187 leads to maintenance of PG synthesis to ensure *bcrC* deletion is not lethal (23). This additional  
188 increase in carrier pool exacerbates the accumulation of UPP even further. To illustrate the model



189 behavior for a *bcrC* overexpression strain (Fig. 4B), we assumed that this strain features a 1.5-fold  
190 stronger UPP phosphatase activity compared to wild-type cells, based on the higher activity of the  
191  $P_{xyIA}$  promoter driving *bcrC* expression in this strain (9) relative to the native  $P_{bcrC}$  promoter (24). All  
192 numerical simulations of the differential equations were performed with custom scripts developed  
193 in MATLAB™ software (The MathWorks, Inc.).

194

### 195 **Luciferase reporter assay**

196 For reporter gene assays, 10 ml of LB or modified chemically defined medium (MCSE, as described in  
197 16) were inoculated 1:1000 from overnight cultures of each strain to be tested. Day cultures were  
198 grown at 37 °C with agitation (180 rpm) to an  $OD_{600}$  of around 0.5, to ensure exponential growth.  
199 Cultures were then diluted into fresh growth medium to an  $OD_{600}$  of 0.01 and distributed into 96  
200 well microplates (Corning®, black, clear flat bottom), with 100  $\mu$ l culture volume per well. Wells  
201 around the plate edge were filled with water to reduce evaporation. Luciferase activity of strains was  
202 determined in a Tecan® Spark® microplate reader controlled by the SparkControl™ software (Tecan  
203 Trading AG, Switzerland). Cells were grown in the microplate reader for 5 hours with continuous  
204 shaking incubation (37 °C, 180 rpm, orbital motion, amplitude: 3 mm). After one hour of incubation,  
205 cells were challenged with varying concentrations of antibiotic. The  $OD_{600}$  and luminescence (relative  
206 luminescence units, RLU) were measured every 5 minutes (integration time: 1000 ms).  
207 Luminescence output was normalized to cell density by dividing each data point by its corresponding  
208 blank-corrected  $OD_{600}$  value ( $RLU OD^{-1}$ ). For dose response curves,  $RLU OD^{-1}$  values were determined  
209 from the average of three data points taken at steady-state (25, 30 and 35 min). Experiments were  
210 carried out at least in biological triplicates. To determine the dose response behaviour of strains for  
211 bacitracin, luminescence values were normalised, with 0 % defined as the lowest, and 100 % as the  
212 highest measured  $RLU OD^{-1}$  value for each strain. Data were then fitted with variable slope dose-  
213 response curves in GraphPad Prism7, using the logarithms of bacitracin concentrations as x, and

214 normalised luminescence as y values, and applying default settings. Statistical comparison of the  
215 resulting EC<sub>50</sub> values was performed using the in-built comparison tool for non-linear regression fits  
216 of GraphPad Prism 7, based on an extra sum-of-squares F test.

## 217 RESULTS AND DISCUSSION

### 218 **BceAB does not import or inactivate bacitracin.**

219 To investigate the resistance mechanism of BceAB-type transporters, we first focussed on the  
220 direction of transport by BceAB. To this end, we applied a modified version of the peptide release  
221 assay established by Otto and colleagues (19). This is based on quantification of the AMP  
222 concentration that remains in the culture supernatant after incubating cell suspensions of bacteria  
223 carrying or lacking the transporter in an AMP-containing buffer. Presence of an importer should lead  
224 to a decrease in the AMP concentration remaining in the buffer, while an increase in AMP  
225 concentration compared to transporter-negative cells would be indicative of a mechanism where the  
226 drug is expelled from the bacterial cell envelope (19, 20). To quantify the remaining bacitracin, we  
227 chose a bioassay-based method, similar to the technique reported by Okuda and colleagues (21, see  
228 methods for details) . This would allow us to determine the amount of biologically active peptide  
229 remaining, to provide additional information on whether the action of BceAB may somehow  
230 inactivate the antibiotic.

231 Earlier models for BceAB action considered bacitracin import, potentially followed by intracellular  
232 degradation (7). Alternative conceivable mechanisms of resistance could be inactivation of the  
233 extracellular AMP, e.g. through shedding of phospholipids, which could be catalysed by BceAB, akin  
234 to a mechanism reported for daptomycin resistance in *S. aureus* (25). However, our bio-assay  
235 methodology did not show any significant reduction in bacitracin activity by BceAB-containing cells  
236 (i.e. wild-type cells that had been pre-induced with low concentrations of bacitracin to ensure *bceAB*  
237 expression), arguing against such mechanisms (Fig. 2). We observed a slight reduction in active  
238 bacitracin compared to the starting concentration of  $5 \mu\text{g ml}^{-1}$ , but this applied to all samples,  
239 including the buffer-control. Therefore, it was likely due to the known oxidative deamination of  
240 bacitracin A to bacitracin F, which lowers the antimicrobial activity (26), during incubation and

241 sample processing. Our data thus indicate that BceAB neither imports bacitracin into the cell, nor  
242 inactivates or degrades bacitracin in the extracellular space.

243 When we compared BceAB positive and negative cells, we could not detect significant differences in  
244 supernatant concentrations of the drug (Fig. 2). This was not in line with our hypothesis that BceAB  
245 should expel bacitracin from the membrane into the extracellular milieu. In a recent study on the  
246 BceAB-type transporter NsrFP from *Streptococcus agalactiae* COH1, which used a similar peptide  
247 release assay, the residual AMP concentration in the culture supernatant was significantly higher in  
248 an *nsrFP*<sup>+</sup> strain compared to strains with no or inactive NsrFP, in agreement with a ‘hydrophobic  
249 vacuum cleaner’ mechanism as proposed for BceAB (27). The main difference to our study was that  
250 the NsrFP experiments were done using the lantibiotic nisin as substrate, and earlier similar studies  
251 had also used lantibiotic substrates (19, 20, 28). As lantibiotics and bacitracin have fundamentally  
252 different modes-of-action, we believe that the peptide release assay may not have been sensitive  
253 enough to detect small differences in the amount of bacitracin attached to the cells.

254 Nevertheless, based on the homology between BceAB and NsrFP, it is plausible that both employ the  
255 same functional mechanism (27). Further support for the expulsion of AMPs from the membrane is  
256 provided by the LanFEG-type transporters, which use such a strategy to confer self-immunity in  
257 AMP-producing bacteria. Well-known examples of this group include the transporters NisFEG of  
258 *Lactococcus lactis* and SpaFEG of *B. subtilis* (2). Several studies have shown that these transporters  
259 effectively mediate resistance against AMPs without degrading or inactivating the drugs, but by  
260 releasing them into the culture supernatant (19, 20, 28, 29). Although LanFEG transporters share no  
261 close evolutionary relationship with BceAB-type systems (2), the fact that they impart resistance  
262 against the same range of antibiotics lends weight to the hypothesis that both use a similar principle  
263 of protection.

264 BceAB-type systems belong to the Type VII ABC transporter superfamily, of which the *E. coli*  
265 macrolide resistance transporter MacB is the paradigm example (30). MacB was recently shown to

266 act according to a molecular bellows mechanism and expel its substrate from the periplasm across  
267 the outer membrane via the TolC exit duct by undergoing extensive conformational changes in its  
268 periplasmic domain (31). This mode of ‘transport’, which does not involve physical movement of a  
269 substrate across a membrane but instead uses intracellular ATP hydrolysis to perform mechanical  
270 work in the periplasm, was termed ‘mechanotransmission’ (31). BceAB shares the critical features of  
271 MacB that are required for the mechanotransmission mechanism (30). In this case, the work carried  
272 out by the transporter would be to shift the equilibrium of the bacitracin binding reaction from the  
273 membrane more towards the extracellular environment. For such a ‘hydrophobic vacuum cleaner’  
274 mechanism to work, the transporter will need to distinguish between the membrane-bound and the  
275 free form of the AMP. Interestingly, bacitracin undergoes an extensive conformational change upon  
276 binding its cellular target, from a free state with no clear hydrophobic moment, to an amphipathic,  
277 closed dome-shaped conformation when bound to UPP (32). While we have shown previously that  
278 BceAB was able to bind bacitracin *in vitro*, these experiments were carried out with detergent-  
279 solubilised protein that may have contained co-purified membrane lipids (6). We therefore cannot  
280 draw any direct conclusions on whether it interacted with the free drug, or with any bacitracin-UPP  
281 complexes (UPP-BAC) that may have been present in the experiment. Therefore, we next aimed to  
282 identify the physiological substrate of BceAB *in vivo*.

### 283 **Exploiting the flux-sensing mechanism as suitable strategy to monitor BceAB activity.**

284 To study the function of BceAB *in vivo*, we first required a strategy to quantify transport activity in  
285 living cells. We previously showed that signalling within the Bce system is directly proportional to  
286 BceAB transport activity (9). As the signalling cascade ultimately leads to activation of the promoter  
287 controlling *bceAB* expression ( $P_{bceA}$ ), the activity of a  $P_{bceA}$ -*luxABCDE* reporter fusion can therefore be  
288 taken as a proxy for BceAB activity (Fig. 1A). Using this approach, we monitored BceAB activity in the  
289 wild-type strain carrying the reporter fusion (SGB73, WT) under several sub-inhibitory bacitracin  
290 concentrations. In agreement with earlier data (9), the threshold concentration to elicit detectable  
291 BceAB activity was  $0.03 \mu\text{g ml}^{-1}$  bacitracin, and the activity gradually increased until maximum levels

292 were reached at  $30 \mu\text{g ml}^{-1}$  (Fig. 1B). As it was previously shown that higher bacitracin  
293 concentrations did not cause a further increase in activity (7, 9, 24), we deemed this concentration a  
294 suitable endpoint.

295

### 296 **Accumulation of UPP specifically increases BceAB activity at low bacitracin concentrations.**

297 While the preliminary experiment in Fig. 1B showed that transport activity increased with higher  
298 bacitracin concentrations, it did not allow us to distinguish between free bacitracin and UPP-BAC as  
299 substrates. This is because the concentration of UPP-BAC will change proportionally to the  
300 concentration of bacitracin added to the culture (Fig. 1C). To distinguish whether the critical variable  
301 determining BceAB transport activity was bacitracin itself or the UPP-BAC complex, we required a  
302 strategy to change the concentration of UPP-BAC, while keeping the concentration of bacitracin  
303 constant. Considering the reaction equilibrium between bacitracin and UPP-BAC (Fig. 1C), this should  
304 be possible by adjusting the cellular levels of UPP, as increased amounts of UPP result in higher  
305 concentrations of UPP-BAC without altering the bacitracin concentration.

306 To find a suitable genetic approach to change the UPP levels in the cell, we turned to mathematical  
307 modelling. Based on the computational description of the lipid II cycle (22), we recently developed a  
308 mathematic model that describes the protective effect of the bacitracin resistance determinants  
309 BceAB and BcrC of *B. subtilis* on the progression of the lipid II cycle (23). This model can predict  
310 changes to the pool levels of lipid II cycle intermediates under different conditions and suggests that  
311 reducing the rate of UPP dephosphorylation increases the level of UPP displayed on the extracellular  
312 face of the membrane. In *B. subtilis*, the dephosphorylation reaction of UPP to UP is catalysed by  
313 two phosphatases, BcrC and UppP (33-35). BcrC plays the more prominent role during exponential  
314 growth, and *bcrC* deletion should thus have the bigger effect on reducing the rate of  
315 dephosphorylation. In a  $\Delta bcrC$  scenario, the model predicted the UPP pool to increase more than  
316 eight-fold over the wild-type levels (Fig. 3A&B).

317 To exploit this finding, we deleted *bcrC* in our reporter strain ( $\Delta bcrC$ ). When we re-tested this strain  
318 for BceAB activity, we observed a striking 10-fold reduction in the threshold concentration required  
319 to trigger detectable transport activity ( $0.003 \mu\text{g ml}^{-1}$ , Fig. 3C). Likewise, maximum BceAB activity  
320 was observed at  $0.3 \mu\text{g ml}^{-1}$  bacitracin (Fig. 3C, turquoise), 100-fold less than required to reach a  
321 similar activity in the wild type (Fig. 3C, dark blue). Fitting of a dose-response curve to the  
322 normalised data for both strains (see methods for details) showed that indeed the half-maximal  
323 effective concentration of bacitracin ( $EC_{50}$ ), i.e. the concentration where BceAB activity was half its  
324 maximum, was shifted from  $5.5 \mu\text{g ml}^{-1}$  in the wild type to  $0.05 \mu\text{g ml}^{-1}$  in the  $\Delta bcrC$  strain (Fig. S1A).  
325 Importantly, the overall shape of the curve was not altered between strains, showing that the  
326 differences were solely due to changes in substrate concentration upon UPP accumulation, not any  
327 mechanistic changes in the transporter itself that may have been caused by *bcrC* deletion. To  
328 explore if UPP alone could serve as the physiological substrate of BceAB, the activity was also  
329 compared in the absence of bacitracin. There was no detectable BceAB activity in either of the  
330 tested strains, which suggested that accumulation of UPP alone was not sufficient to trigger  
331 transport by BceAB. These findings were a first indication that the critical variable that determines  
332 BceAB activity is the concentration of UPP-BAC complexes, rather than bacitracin or UPP alone.  
333 In the wild type, induction of  $P_{bceA}$  of course not only drives reporter gene expression but also  
334 increases the amount of BceAB present in the cell. To exclude that the observed sensitivity shift  
335 upon UPP accumulation was not due to changes in *bceAB* expression, we uncoupled BceAB  
336 production from its native regulation. This was achieved by deleting the native copy of *bceAB* in the  
337 reporter strain and introducing an ectopic copy under xylose-inducible control ( $P_{xyIA}$ -*bceAB*; strain  
338 SGB218). The same was done in the  $\Delta bcrC$  reporter, resulting in strain SGB677. Comparing BceAB  
339 activity in these two strains again showed a marked decrease (30-fold) in the threshold bacitracin  
340 concentration required to trigger detectable activity upon accumulation of UPP (Fig. S1B). This  
341 shows that the observed shift in sensitivity of BceAB could not be explained by indirect regulatory  
342 effects on *bceAB* expression.

343 Accumulation of UPP may have caused wider alterations in the cell membrane and/or affected  
344 BceAB activity in a non-specific manner, rather than the intended change in the concentration of  
345 UPP-BAC complexes. Therefore, we next tested if *bcrC* deletion also altered BceAB activity in  
346 response to AMPs that do not interfere with UPP. To this end, we measured BceAB activity in  
347 response to mersacidin and deoxy-actagardine B, two other AMPs that are known substrates for  
348 BceAB (8). As both of these peptides target lipid II but not UPP, the complex formation between  
349 these AMPs and their respective cellular target should be unaffected by changes in the UPP level.  
350 Indeed, our theoretical model predicted that the lipid II pool on the extracellular face of the  
351 membrane would remain almost unchanged in a  $\Delta bcrC$  scenario compared to the wild type (Fig.  
352 3A&B). This is because the total amount of lipid carrier is homeostatically increased in a *bcrC*  
353 deletion strain to ensure a close-to-optimal rate of peptidoglycan synthesis (23). The model  
354 therefore confirms that decreasing the UPP dephosphorylation rate in the  $\Delta bcrC$  strain specifically  
355 causes accumulation of UPP but does not affect other cycle intermediates.

356 As with bacitracin, a gradual increase of BceAB activity was observed with increasing amounts of  
357 mersacidin or deoxy-actagardine B, in both the wild type and  $\Delta bcrC$  strains (Fig. 3D, E). However, we  
358 did not observe any significant differences in threshold substrate concentrations nor overall BceAB  
359 activity between the two strains. As an additional control, we tested the activity of a second BceAB-  
360 type transporter in *B. subtilis*, PsdAB, which confers resistance against nisin, another lipid II binding  
361 AMP (8). PsdAB activity was determined using the same luminescence-based assay principle as for  
362 BceAB, but with  $P_{psdA}$  activity as a proxy for transport activity. As before, activity increased with nisin  
363 concentration in both the wild type and  $\Delta bcrC$  mutant, but again no significant differences between  
364 strains were observed (Fig. 3F). These findings show that *bcrC* deletion and concomitant  
365 accumulation of UPP did not have a general effect on BceAB or PsdAB function. Instead, BceAB  
366 activity appeared to specifically depend on the concentration of UPP-BAC in the membrane. This is  
367 consistent with the proposed hypothesis for a ‘hydrophobic vacuum cleaner’ mechanism of



368 transport, suggesting that the physiological substrate of BceAB is indeed the antibiotic in complex  
369 with its cellular target.

370

### 371 **Depletion of UPP affects transport activity on a global level**

372 To further explore the effect of altered UPP levels on BceAB activity, we next sought to decrease the  
373 pool of UPP displayed on the outer face of the membrane, and hence the amount of UPP-BAC  
374 complexes formed. The mathematical model predicted that an increased rate of UPP  
375 dephosphorylation, e.g. by overproducing BcrC, may lead to such a decreased UPP pool (Fig. 4A&B),  
376 although differences to the wild type are less pronounced than with *bcrC* deletion. To realise this  
377 experimentally, we overproduced BcrC by placing an additional copy of *bcrC* under control of the  
378 xylose-inducible promoter  $P_{xyIA}$  (SGB758). Testing the BceAB activities in the strain with reduced UPP  
379 levels led to overall lower activity upon addition of bacitracin, and even at the maximal  
380 concentration tested the activity was less than 50 % of the wild-type activity (Fig. 4C). The threshold  
381 concentration required to trigger detectable activity was only marginally increased. Fitting the  
382 normalised activities with a dose-response curve produced identical results for both strains (Fig.  
383 S1C). This suggests that BcrC overproduction led to an overall decrease in BceAB activity, but had no  
384 effect on the transporter's sensitivity to the substrate. Also consistent with a more global effect of  
385 BcrC overproduction on cell physiology, was the observation that BceAB activity was similarly  
386 reduced when mersacidin and deoxy-actagardine B were tested (Fig. 4D&E). Likewise, the activity of  
387 PsdAB using nisin as substrate was also reduced (Fig. 4F). It therefore appears that overproduction of  
388 BcrC did not have the desired effect of solely reducing the UPP pool in the cell, but instead led to  
389 wider-ranging changes that affected either multiple stages of the lipid II cycle, explaining similar  
390 effects on bacitracin and lipid II-binding AMPs, or impeded the mechanical functions of the  
391 membrane-embedded transporters to reduce their overall activity. Without further knowledge on  
392 the precise cellular effects of BcrC overproduction it is difficult to interpret these results. However,

393 while they do not further support our hypothesis that BceAB recognises its substrate AMP as a  
394 complex with the cellular target, they also do not disprove it.

395

396 **Accumulation of C<sub>35</sub>-PP (HPP) does not inhibit BceAB activity.**

397 In addition to the theories on bacitracin import, export or inactivation by BceAB-type transporters, a  
398 drastically different mechanism has been proposed where BceAB could protect the cell from  
399 bacitracin by flipping UPP from the outer leaflet of the membrane to the inner face, thereby  
400 shielding it from the AMP (14). This hypothesis was based on the observation that accumulation of  
401 the C<sub>35</sub> isoprenoid heptaprenyl diphosphate (HPP) in the membrane sensitises the cell to bacitracin.  
402 HPP was hypothesised to act as a competitive inhibitor of BceAB and to reduce its transport activity  
403 (14). To explore this hypothesis further, we next tested the effect of HPP accumulation on BceAB  
404 activity, using the luciferase-based assay described above. Accumulation of HPP can be created by  
405 manipulations of the isoprenoid biosynthesis pathway (14), specifically via deletion of *ytpB*, which  
406 encodes a tetraprenyl-beta-curcumene synthase (Sato *et al.*, 2011), and simultaneous limitation of  
407 the activity of MenA, a key enzyme in the menaquinone pathway (Kingston *et al.*, 2014). The *menA*  
408 gene is essential, but a reduction in enzymatic activity can be achieved by growth in tryptophan-  
409 limited conditions (14). Therefore, to determine whether BceAB activity is inhibited by HPP  
410 accumulation, we tested BceAB activity in a  $\Delta ytpB \Delta menA$  deletion strain that carried an ectopic  
411 IPTG-inducible copy of *menA* (SGB929, based on HB13438 (14)) and was grown in a tryptophan-  
412 limited defined medium without addition of IPTG.

413 Interestingly, the threshold bacitracin concentration required to trigger transport, as well as the  
414 activity at peak stimulation were indistinguishable between the two strains, showing that HPP  
415 accumulation did not affect BceAB activity (Fig. 5). To confirm that our strategy had led to the  
416 desired HPP accumulation, we tested the bacitracin sensitivity of both strains. The MIC decreased  
417 from  $173 \pm 12 \mu\text{g ml}^{-1}$  in the wild type to  $120 \mu\text{g ml}^{-1}$  in the mutant strain, in line with the previously

418 reported increased susceptibility upon HPP accumulation (14). Based on these results, we concluded  
419 that the increased bacitracin sensitivity was not due to direct inhibition of BceAB activity by HPP.  
420 Instead, our interpretation is that BceAB likely cannot distinguish between UPP-BAC and HPP-BAC.  
421 Bacitracin was shown to tightly interact with the pyrophosphate group and only the first isoprenoid  
422 unit of its substrate, based on its co-crystal structure with the C<sub>10</sub> isoprenoid geranyl pyrophosphate  
423 (32). It is therefore expected that HPP will also serve as a bacitracin target in the cell, and its  
424 accumulation will lead to the simultaneous presence of both UPP-BAC and HPP-BAC complexes. In  
425 the context of our findings above that UPP-BAC – and by analogy also HPP-BAC – is the likely  
426 physiological substrate of BceAB, it is plausible that either complex will drive BceAB activity. Hence,  
427 accumulation of HPP did not affect the net transport activity. However, HPP cannot substitute for  
428 UPP in the lipid II cycle. Any activity of BceAB invested in the removal of bacitracin from HPP is  
429 therefore futile with respect to resistance, which can explain the increased bacitracin sensitivity  
430 observed upon HPP accumulation. Taking together our findings with the previous detailed study of  
431 the effects of HPP accumulation on bacitracin resistance (14), a model where BceAB removes  
432 bacitracin from its cellular targets appears more in line with the available experimental evidence  
433 than a UPP-flipping mechanism. Furthermore, as mentioned, BceAB also confers resistance against  
434 lipid II-binding AMPs, namely mersacidin, actagardine and the fungal defensin plectasin (8, 36). For  
435 these compounds, it is difficult to envisage a flipping mechanism as an effective strategy to shield  
436 the target from AMP access, because import of lipid II runs counter the process of cell wall  
437 biosynthesis, where peptidoglycan precursors are required on the surface of the membrane.

438

#### 439 **CONCLUDING REMARKS.**

440 In this study, we set out to address the much-debated question on the mode-of-action of BceAB-  
441 type resistance systems and how a transporter may be used to protect the cell from antibiotics that  
442 have targets on the cell surface. The balance of evidence presented here and in the literature  
443 appears to be in clear favour of BceAB acting as a ‘hydrophobic vacuum cleaner’, which is in line with

444 the mechanotransmission mechanism proposed for Type VII superfamily ABC systems (30, 31). In  
445 this model, BceAB specifically recognises its substrate AMPs in complex with their respective cellular  
446 target, here experimentally tested for UPP-BAC. ATP hydrolysis in the cytoplasm then provides the  
447 required energy to break the interaction between bacitracin and UPP on the cell surface. This is not  
448 a novel concept in a transporter, because the human cholesterol transporter ABCG5/8 employs a  
449 similar mechanism to remove cholesterol from the cytoplasmic membrane of hepatocytes, using the  
450 energy from ATP-hydrolysis to break the interactions between cholesterol and membrane  
451 phospholipids (37). In the case of BceAB, a shift in equilibrium from target-bound AMP to free AMP  
452 can be achieved if the transporter has a low affinity to the free antibiotic and therefore releases it as  
453 soon as it is removed from the target. Given the substantial conformational change of bacitracin and  
454 other peptides between the free and target-bound forms (1, 38-40), this seems entirely plausible. In  
455 support of this idea, we have only been able to show binding of bacitracin by the entire detergent-  
456 solubilised transporter, where UPP may have been co-purified (6), but never with its isolated  
457 extracellular domain that provides substrate specificity in BceAB-like systems (41) and therefore is  
458 thought to contain the ligand binding site (own unpublished data).

459 How then does a simple shift in equilibrium confer the high level of resistance that is the hallmark of  
460 BceAB-like transporters? For one, there is ample evidence that the LanFEG-type transporters of AMP  
461 producing bacteria work by exactly such a mechanism to provide effective protection from the self-  
462 produced AMP (19, 20, 28, 29). Moreover, a similar principle, albeit not on the cell surface, is seen in  
463 resistance against tetracyclines, a group of antibiotics that target the bacterial ribosome. Here,  
464 ribosomal protection proteins like Tet(O) and Tet(M) were shown to actively release tetracycline  
465 from the ribosome in a GTP-driven manner (42, 43). This mechanism effectively increases the  
466 dissociation rate of tetracycline and secures continued protein synthesis (44). Interestingly, another  
467 resistance system that protects ribosomal function from antibiotic attack is a group of proteins  
468 referred to as Antibiotic Resistance ATP-Binding Cassette-F (ARE ABC-F). While originally annotated  
469 as transporters, these proteins lack any transmembrane segments and instead act by modulating the

470 binding affinity between antibiotics and the ribosome, thus effectively dislodging the drugs (45, 46).  
471 This mode of resistance has been collectively termed ‘target protection’, and generally involves the  
472 direct release of a cellular target from the inhibitory action of the antibiotic (46, 47). Target  
473 protection has been reported for the ribosome and DNA replication (48-50), but to our knowledge  
474 no example has been described to date for protection of cell wall synthesis. We now propose that  
475 BceAB-type transporters act by target protection of the lipid II cycle. By physically freeing UPP from  
476 the grip of bacitracin (or analogously, freeing lipid II from lantibiotics), BceAB ensures that the  
477 affected enzyme (UPP-phosphatase or PG transglycosylases, respectively) can catalyse the following  
478 step of cell wall synthesis, enabling the cycle to continue at least for one more round before the  
479 antibiotic can re-bind its target. Importantly, to our knowledge this mode of action is in agreement  
480 with all experimental data currently available on BceAB-like systems. Recognition of target-AMP  
481 complexes – rather than the free peptides – offers an explanation for the seemingly random  
482 substrate specificity of BceAB-like systems (8, 51), where the specificity determinant likely only  
483 becomes apparent in the antibiotic-target complex. It also explains the observations on reduced  
484 resistance upon over-production of HPP in the cell, where some of BceAB’s transport activity is likely  
485 invested in the futile removal of bacitracin from HPP rather than UPP (14). And it is consistent with  
486 the data reported here and previously (9, 23) that the factor determining transport activity of BceAB  
487 is the concentration of UPP-BAC complexes in the cell. Target protection of cell wall synthesis also  
488 offers a plausible explanation for the use of transporters in resistance against cell wall-active  
489 antibiotics in Gram-positive bacteria. Whereas the outer membrane of Gram-negative  
490 microorganisms creates a discrete compartment, and transporters can be used to change a  
491 compound’s concentration in this space, Gram-positive bacteria lack an equivalent structure. It will  
492 be interesting to explore if other transport systems in these bacteria operate by a similar mechanism  
493 to protect the cell wall synthesis machinery from antibiotic attack.  
494

495

## 496 **ACKNOWLEDGEMENTS**

497 The authors would like to thank John Helmann for kindly giving us strain HB13438 and its  
498 progenitors, and Cantab Anti-Infectives Ltd. for the generous gift of mersacidin and deoxy-  
499 actagardine B. We also thank Marjorie Gibbon and Sebastian Dintner for cloning of luciferase  
500 reporter constructs.

501 Work in SG's lab was supported by the Biotechnology and Biological Sciences Research Council  
502 (BBSRC; BB/M029255/1). CMK was supported by a University of Bath Research Studentship Award.

503 Work in GF's group was supported by the LOEWE Program of the State of Hesse (SYNMIKRO) and the  
504 Deutsche Forschungsgemeinschaft (DFG; FR3673/1-2). HP was supported by the Cusanuswerk  
505 scholarship program (Germany).

506 JE's contributions were the results of a master's research project carried out at LMU Munich in 2013  
507 under supervision of SG and GF.

508

## 509 **REFERENCES**

- 510 1. Breukink E, de Kruijff B. 2006. Lipid II as a target for antibiotics. *Nat Rev Drug Discov* 5:321-  
511 32.
- 512 2. Gebhard S. 2012. ABC transporters of antimicrobial peptides in Firmicutes bacteria -  
513 phylogeny, function and regulation. *Mol Microbiol* 86:1295-317.
- 514 3. Revilla-Guarinos A, Gebhard S, Mascher T, Zuniga M. 2014. Defence against antimicrobial  
515 peptides: different strategies in Firmicutes. *Environ Microbiol* 16:1225-37.
- 516 4. Dintner S, Staron A, Berchtold E, Petri T, Mascher T, Gebhard S. 2011. Coevolution of ABC  
517 transporters and two-component regulatory systems as resistance modules against  
518 antimicrobial peptides in Firmicutes Bacteria. *J Bacteriol* 193:3851-62.
- 519 5. Ohki R, Giyanto, Tateno K, Masuyama W, Moriya S, Kobayashi K, Ogasawara N. 2003. The  
520 BceRS two-component regulatory system induces expression of the bacitracin transporter,  
521 BceAB, in *Bacillus subtilis*. *Mol Microbiol* 49:1135-1144.
- 522 6. Dintner S, Heermann R, Fang C, Jung K, Gebhard S. 2014. A sensory complex consisting of an  
523 ATP-binding cassette transporter and a two-component regulatory system controls  
524 bacitracin resistance in *Bacillus subtilis*. *J Biol Chem* 289:27899-910.
- 525 7. Rietkötter E, Hoyer D, Mascher T. 2008. Bacitracin sensing in *Bacillus subtilis*. *Mol Microbiol*  
526 68:768-85.
- 527 8. Staron A, Finkeisen DE, Mascher T. 2011. Peptide antibiotic sensing and detoxification  
528 modules of *Bacillus subtilis*. *Antimicrob Agents Chemother* 55:515-25.

- 529 9. Fritz G, Dintner S, Treichel NS, Radeck J, Gerland U, Mascher T, Gebhard S. 2015. A New Way  
530 of Sensing: Need-Based Activation of Antibiotic Resistance by a Flux-Sensing Mechanism.  
531 MBio 6:e00975.
- 532 10. Podlesek Z, Comino A, Herzog-Velikonja B, Zgur-Bertok D, Komel R, Grabnar M. 1995.  
533 *Bacillus licheniformis* bacitracin-resistance ABC transporter: relationship to mammalian  
534 multidrug resistance. Mol Microbiol 16:969-76.
- 535 11. Podlesek Z, Comino A, Herzog-Velikonja B, Grabnar M. 2000. The role of the bacitracin ABC  
536 transporter in bacitracin resistance and collateral detergent sensitivity. FEMS Microbiol Lett  
537 188:103-6.
- 538 12. Higgins CF, Gottesman MM. 1992. Is the Multidrug Transporter a Flippase. Trends in  
539 Biochemical Sciences 17:18-21.
- 540 13. Gottesman MM, Pastan I. 1993. Biochemistry of multidrug resistance mediated by the  
541 multidrug transporter. Annu Rev Biochem 62:385-427.
- 542 14. Kingston AW, Zhao H, Cook GM, Helmann JD. 2014. Accumulation of heptaprenyl  
543 diphosphate sensitizes *Bacillus subtilis* to bacitracin: implications for the mechanism of  
544 resistance mediated by the BceAB transporter. Mol Microbiol 93:37-49.
- 545 15. Kunst F, Rapoport G. 1995. Salt stress is an environmental signal affecting degradative  
546 enzyme synthesis in *Bacillus subtilis*. J Bacteriol 177:2403-7.
- 547 16. Radeck J, Kraft K, Bartels J, Cikovic T, Dürr F, Emenegger J, Kelterborn S, Sauer C, Fritz G,  
548 Gebhard S, Mascher T. 2013. The *Bacillus* BioBrick Box: generation and evaluation of  
549 essential genetic building blocks for standardized work with *Bacillus subtilis*. J Biol Eng 7:29.
- 550 17. Kallenberg F, Dintner S, Schmitz R, Gebhard S. 2013. Identification of regions important for  
551 resistance and signalling within the antimicrobial peptide transporter BceAB of *Bacillus*  
552 *subtilis*. J Bacteriol 195:3287-97.
- 553 18. Popp PF, Dotzler M, Radeck J, Bartels J, Mascher T. 2017. The *Bacillus* BioBrick Box 2.0:  
554 expanding the genetic toolbox for the standardized work with *Bacillus subtilis*. Sci Rep  
555 7:15058.
- 556 19. Otto M, Peschel A, Gotz F. 1998. Producer self-protection against the lantibiotic epidermin  
557 by the ABC transporter EpiFEG of *Staphylococcus epidermidis* Tu3298. FEMS Microbiol Lett  
558 166:203-11.
- 559 20. Stein T, Heinzmann S, Solovieva I, Entian KD. 2003. Function of *Lactococcus lactis* nisin  
560 immunity genes *nisl* and *nisFEG* after coordinated expression in the surrogate host *Bacillus*  
561 *subtilis*. J Biol Chem 278:89-94.
- 562 21. Okuda K, Yanagihara S, Sugayama T, Zendo T, Nakayama J, Sonomoto K. 2010. Functional  
563 significance of the E loop, a novel motif conserved in the lantibiotic immunity ATP-binding  
564 cassette transport systems. J Bacteriol 192:2801-8.
- 565 22. Piepenbreier H, Diehl A, Fritz G. 2019. Minimal exposure of lipid II cycle intermediates  
566 triggers cell wall antibiotic resistance. Nat Commun 10:2733.
- 567 23. Piepenbreier H, Sim A, Kobras CM, Radeck J, Mascher T, Gebhard S, Fritz G. 2019. From  
568 modules to networks: A systems-level analysis of the bacitracin stress response in *Bacillus*  
569 *subtilis*. bioRxiv doi:10.1101/827469:827469.
- 570 24. Radeck J, Gebhard S, Orchard PS, Kirchner M, Bauer S, Mascher T, Fritz G. 2016. Anatomy of  
571 the bacitracin resistance network in *Bacillus subtilis*. Mol Microbiol 100:607-20.
- 572 25. Pader V, Hakim S, Painter KL, Wigneshweraraj S, Clarke TB, Edwards AM. 2016.  
573 *Staphylococcus aureus* inactivates daptomycin by releasing membrane phospholipids. Nat  
574 Microbiol 2:16194.
- 575 26. Storm DR, Strominger JL. 1973. Complex formation between bacitracin peptides and  
576 isoprenyl pyrophosphates. The specificity of lipid-peptide interactions. J Biol Chem  
577 248:3940-5.

- 578 27. Reiners J, Lagedroste M, Ehlen K, Leusch S, Zschke-Kriesche J, Smits SHJ. 2017. The N-  
579 terminal Region of Nisin Is Important for the BceAB-Type ABC Transporter NsrFP from  
580 *Streptococcus agalactiae* COH1. *Front Microbiol* 8:1643.
- 581 28. Stein T, Heinzmann S, Dusterhus S, Borchert S, Entian KD. 2005. Expression and functional  
582 analysis of the subtilin immunity genes *spaIFEG* in the subtilin-sensitive host *Bacillus subtilis*  
583 MO1099. *J Bacteriol* 187:822-8.
- 584 29. Okuda K, Aso Y, Nakayama J, Sonomoto K. 2008. Cooperative transport between NukFEG  
585 and NukH in immunity against the lantibiotic nukacin ISK-1 produced by *Staphylococcus*  
586 *warneri* ISK-1. *J Bacteriol* 190:356-62.
- 587 30. Greene NP, Kaplan E, Crow A, Koronakis V. 2018. Antibiotic Resistance Mediated by the  
588 MacB ABC Transporter Family: A Structural and Functional Perspective. *Front Microbiol*  
589 9:950.
- 590 31. Crow A, Greene NP, Kaplan E, Koronakis V. 2017. Structure and mechanotransmission  
591 mechanism of the MacB ABC transporter superfamily. *Proc Natl Acad Sci U S A* 114:12572-  
592 12577.
- 593 32. Economou NJ, Cocklin S, Loll PJ. 2013. High-resolution crystal structure reveals molecular  
594 details of target recognition by bacitracin. *Proc Natl Acad Sci U S A* 110:14207-12.
- 595 33. Cao M, Helmann JD. 2002. Regulation of the *Bacillus subtilis* *bcrC* Bacitracin Resistance Gene  
596 by Two Extracytoplasmic Function  $\sigma$  Factors. *Journal of Bacteriology* 184:6123-6129.
- 597 34. Zhao H, Sun Y, Peters JM, Gross CA, Garner EC, Helmann JD. 2016. Depletion of  
598 Undecaprenyl Pyrophosphate Phosphatases Disrupts Cell Envelope Biogenesis in *Bacillus*  
599 *subtilis*. *J Bacteriol* 198:2925-2935.
- 600 35. Radeck J, Lautenschlager N, Mascher T. 2017. The Essential UPP Phosphatase Pair BcrC and  
601 UppP Connects Cell Wall Homeostasis during Growth and Sporulation with Cell Envelope  
602 Stress Response in *Bacillus subtilis*. *Front Microbiol* 8:2403.
- 603 36. Schneider T, Kruse T, Wimmer R, Wiedemann I, Sass V, Pag U, Jansen A, Nielsen AK, Mygind  
604 PH, Raventos DS, Neve S, Ravn B, Bonvin AM, De Maria L, Andersen AS, Gammelgaard LK,  
605 Sahl HG, Kristensen HH. 2010. Plectasin, a fungal defensin, targets the bacterial cell wall  
606 precursor Lipid II. *Science* 328:1168-72.
- 607 37. Small DM. 2003. Role of ABC transporters in secretion of cholesterol from liver into bile. *Proc*  
608 *Natl Acad Sci U S A* 100:4-6.
- 609 38. Hsu ST, Breukink E, Bierbaum G, Sahl HG, de Kruijff B, Kaptein R, van Nuland NA, Bonvin AM.  
610 2003. NMR study of mersacidin and lipid II interaction in dodecylphosphocholine micelles.  
611 Conformational changes are a key to antimicrobial activity. *J Biol Chem* 278:13110-7.
- 612 39. Fujinami D, Mahin AA, Elsayed KM, Islam MR, Nagao JI, Roy U, Momin S, Zendo T, Kohda D,  
613 Sonomoto K. 2018. The lantibiotic nukacin ISK-1 exists in an equilibrium between active and  
614 inactive lipid-II binding states. *Commun Biol* 1:150.
- 615 40. Medeiros-Silva J, Jekhmane S, Paioni AL, Gawarecka K, Baldus M, Swiezewska E, Breukink E,  
616 Weingarth M. 2018. High-resolution NMR studies of antibiotics in cellular membranes. *Nat*  
617 *Commun* 9:3963.
- 618 41. Hiron A, Falord M, Valle J, Debarbouille M, Msadek T. 2011. Bacitracin and nisin resistance in  
619 *Staphylococcus aureus*: a novel pathway involving the BraS/BraR two-component system  
620 (SA2417/SA2418) and both the BraD/BraE and VraD/VraE ABC transporters. *Mol Microbiol*  
621 81:602-22.
- 622 42. Burdett V. 1996. Tet(M)-promoted release of tetracycline from ribosomes is GTP dependent.  
623 *J Bacteriol* 178:3246-51.
- 624 43. Trieber CA, Burkhardt N, Nierhaus KH, Taylor DE. 1998. Ribosomal protection from  
625 tetracycline mediated by Tet(O): Tet(O) interaction with ribosomes is GTP-dependent. *Biol*  
626 *Chem* 379:847-55.
- 627 44. Connell SR, Tracz DM, Nierhaus KH, Taylor DE. 2003. Ribosomal protection proteins and their  
628 mechanism of tetracycline resistance. *Antimicrob Agents Chemother* 47:3675-81.



- 629 45. Sharkey LK, Edwards TA, O'Neill AJ. 2016. ABC-F Proteins Mediate Antibiotic Resistance  
630 through Ribosomal Protection. *MBio* 7:e01975.
- 631 46. Sharkey LKR, O'Neill AJ. 2018. Antibiotic Resistance ABC-F Proteins: Bringing Target  
632 Protection into the Limelight. *ACS Infect Dis* 4:239-246.
- 633 47. Wilson DN. 2016. The ABC of Ribosome-Related Antibiotic Resistance. *MBio* 7.
- 634 48. Ruiz J. 2003. Mechanisms of resistance to quinolones: target alterations, decreased  
635 accumulation and DNA gyrase protection. *J Antimicrob Chemother* 51:1109-17.
- 636 49. Tran JH, Jacoby GA, Hooper DC. 2005. Interaction of the plasmid-encoded quinolone  
637 resistance protein QnrA with *Escherichia coli* topoisomerase IV. *Antimicrob Agents*  
638 *Chemother* 49:3050-2.
- 639 50. Correia S, Poeta P, Hebraud M, Capelo JL, Igrejas G. 2017. Mechanisms of quinolone action  
640 and resistance: where do we stand? *J Med Microbiol* 66:551-559.
- 641 51. Gebhard S, Mascher T. 2011. Antimicrobial peptide sensing and detoxification modules:  
642 unravelling the regulatory circuitry of *Staphylococcus aureus*. *Mol Microbiol* 81:581-7.
- 643 52. Schmalisch M, Maiques E, Nikolov L, Camp AH, Chevreur B, Muffler A, Rodriguez S, Perkins J,  
644 Losick R. 2010. Small genes under sporulation control in the *Bacillus subtilis* genome. *J*  
645 *Bacteriol* 192:5402-12.

646

647 **FIGURE LEGENDS**

648 **Fig. 1: Antibiotic resistance and flux-sensing by BceAB.** **A:** Schematic of the BceAB-BceRS resistance  
649 system. The transporter BceAB confers resistance against bacitracin (BAC), which acts by binding its  
650 cellular target UPP. The different debated mechanisms for resistance by BceAB are indicated by  
651 dashed arrows (see text for details). Flux-sensing communicates the transport activity of BceAB to  
652 the kinase BceS (red wave arrow), causing activation of BceR, which induces transcription from the  
653 target promoter  $P_{bceA}$ . This results in increased production of BceAB, and therefore adjusted levels of  
654 resistance. As signalling is directly proportional to BceAB activity, we can use the target promoter  
655  $P_{bceA}$  fused to a luciferase reporter to monitor transport activity. TCS, genes encoding the two-  
656 component regulatory system BceRS; ABC, genes encoding the resistance transporter BceAB. **B:**  
657 Using luciferase activity as a proxy, BceAB activity of wild-type *B. subtilis* W168 carrying the  $P_{bceA}$ -*lux*  
658 reporter fusion (WT, SGB73) was determined following 25-35 min challenge of exponentially growing  
659 cells with sub-inhibitory concentrations of bacitracin. All data are depicted as mean  $\pm$  standard  
660 deviation of at least three biological replicates. **C:** Binding reaction between free bacitracin and its  
661 cellular target UPP. The change in concentration of UPP-bacitracin complexes (UPP-BAC) through  
662 manipulation of either bacitracin or UPP concentrations is indicated by bold font and upward-facing  
663 arrows.

664

665 **Fig. 2: Bacitracin is neither imported nor inactivated by BceAB.** Cell suspensions of  $OD_{600} = 10$  of *B.*  
666 *subtilis* W168 (WT) and an isogenic  $\Delta bceAB$  mutant (TMB035), as well as a buffer control (No cells)  
667 were incubated with  $5 \mu\text{g ml}^{-1}$  bacitracin for 30 min. The biologically active bacitracin remaining in  
668 the supernatant after incubation was quantified using a bio-assay. Data are shown as mean  $\pm$   
669 standard deviation of at least three biological replicates. One-way ANOVA analysis did not show  
670 significant differences between samples.

671

672 **Fig. 3: Accumulation of UPP increases transport activity at low bacitracin concentrations, but does**  
673 **not affect activity on lipid II binding AMPs. A, B:** Pool levels of lipid II cycle intermediates, as  
674 predicted by mathematical modelling, are indicated by the relative size of blue bubbles, and  
675 numbers of molecules per cell for each intermediate are given. The rate of peptidoglycan (PG)  
676 synthesis is shown in molecules of precursor incorporated per minute. The thickness of the arrow for  
677 *de novo* UPP synthesis reflects the previously described homeostatic increase in lipid carrier  
678 synthesis upon *bcrC* deletion (23). **C, D, E, F:** Effect of UPP  
679 accumulation on transport activity *in vivo*. As a proxy for transport, luminescence activities of  $P_{bceA^-}$   
680 *lux* (C, D, E) or  $P_{psdA^-lux}$  (F) reporter strains were determined 25-35 min following challenge of  
681 exponentially growing cells with varying concentrations of AMPs as indicated. Each panel shows the  
682 results for one AMP given below the x-axis. Dark bars show results in the wild-type background  
683 (SGB73 or SGB74), lighter bars in the isogenic  $\Delta bcrC$  background (SGB649 or SGB681). Data are  
684 shown as mean  $\pm$  standard deviation of at least three biological replicates. The increased activity  
685 seen in the  $\Delta bcrC$  background compared to wild type was tested for statistical significance using  
686 two-sided t-tests with *post-hoc* Bonferroni-Dunn correction for multiple comparisons (\*\*\*\*:  $p <$   
687 0.0001, \*\*\*:  $p < 0.001$ , \*\*:  $p < 0.01$ , \*:  $0.01 < p < 0.05$ ).

688

689 **Fig. 4: Depletion of UPP has a global negative effect on transport. A, B:** Pool levels of lipid II cycle  
690 intermediates, as predicted by mathematical modelling, are indicated by the relative size of blue  
691 bubbles, and numbers of molecules per cell for each intermediate are given. The rate of  
692 peptidoglycan (PG) synthesis is shown in molecules of precursor incorporated per minute. A, wild  
693 type; B, BcrC overproduction strain. **C, D, E, F:** Effect of UPP depletion on transport activity *in vivo*. As  
694 a proxy for transport, luminescence activities of  $P_{bceA^-lux}$  (C, D, E) or  $P_{psdA^-lux}$  (F) reporter strains  
695 were determined 25-35 min following challenge of exponentially growing cells with varying  
696 concentrations of AMPs as indicated. Each panel shows the results for one AMP given below the x-

697 axis. Dark bars show results in the wild-type background (SGB73 or SGB74), lighter bars in a strain  
698 overproducing BcrC (SGB758 or SGB974). Data are shown as mean  $\pm$  standard deviation of at least  
699 three biological replicates. Tests for statistical significance of differences in activity in the  
700 overproduction versus wild-type backgrounds were done by two-sided t-test with *post-hoc*  
701 Bonferroni-Dunn correction for multiple comparisons (\*\*\*\*:  $p < 0.0001$ , \*\*\*:  $p < 0.001$ , \*\*:  $p < 0.01$ ,  
702 \*:  $0.01 < p < 0.05$ ).

703

704 **Fig. 5: Accumulation of HPP does not inhibit BceAB activity.** Transport activities, using luciferase  
705 activity of the  $P_{bceA}$ -*lux* reporter as a proxy, were determined for the WT (SGB927, dark grey) and a  
706 HPP accumulation strain ( $\Delta ytpB \Delta menA amyE::P_{spac(hy)}-menA$ , SGB929, light grey) grown in MCSE  
707 minimal medium, 25-35 minutes following exposure to varying bacitracin concentrations. Data are  
708 shown as mean  $\pm$  standard deviation of at least three biological replicates. Two-sided t-tests with  
709 *post-hoc* Bonferroni-Dunn correction for multiple comparisons did not show any significant  
710 difference between the wild-type and the HPP accumulation strain.

711

712 **Fig. S1: Bacitracin dose response behaviour of BceAB. A, C:** Bacitracin dose response curves of  
713 BceAB activity were fitted on normalised data of the WT (SGB73) and  $\Delta bcrC$  mutant (A, SGB649), or  
714 BcrC overproduction strain (C, SGB758). To obtain the best fit of experimental data a non-linear fit  
715 with variable slope was chosen. Statistical analyses of the  $\log(EC_{50})$  values using the in-build non-  
716 linear regression comparison of GraphPad Prism7 showed a significant difference between the WT  
717 and  $\Delta bcrC$  mutant (\*\*\*\*:  $p < 0.0001$ ), but no difference between WT and BcrC overproduction strain  
718 ( $p = 0.73$ ). **B:** BceAB activity was tested in wild-type (SGB218) and  $\Delta bcrC$  strains (SGB677), in which  
719 BceAB production was uncoupled from its native regulation. Expression of *bceAB* was induced by  
720 addition of 0.2 % (w/v) xylose. All data are shown as mean  $\pm$  standard deviation of at least three  
721 biological replicates.

722 TABLES

723 Table 1: Plasmids and bacterial strains used in this study.

| Name                                  | Genotype and description <sup>a</sup>                                                                                                                        | Source                                |
|---------------------------------------|--------------------------------------------------------------------------------------------------------------------------------------------------------------|---------------------------------------|
| <b>Plasmids</b>                       |                                                                                                                                                              |                                       |
| pAH328                                | Vector for transcriptional promoter fusions to <i>luxABCDE</i> ; integrates in <i>B. subtilis sacA</i> ; Amp <sup>r</sup> , Cm <sup>r</sup>                  | (52)                                  |
| pBS2E                                 | Empty vector; integrates in <i>B. subtilis lacA</i> ; Amp <sup>r</sup> , mls <sup>r</sup>                                                                    | (16)                                  |
| pBS3Elux                              | Vector for transcriptional promoter fusions to <i>luxABCDE</i> ; integrates in <i>B. subtilis sacA</i> ; Amp <sup>r</sup> , Mls <sup>r</sup>                 | (18)                                  |
| pSB1A3                                | Empty BioBrick standard cloning vector for <i>E. coli</i> ; Amp <sup>r</sup>                                                                                 | Registry of Standard Biological Parts |
| pSDlux101                             | pAH328 harbouring a transcriptional P <sub>bceA</sub> - <i>luxABCDE</i> fusion                                                                               | (17)                                  |
| pSDlux102                             | pAH328 harbouring a transcriptional P <sub>psdA</sub> - <i>luxABCDE</i> fusion                                                                               | This study                            |
| pJNESB101                             | pSB1A3 harbouring <i>B. subtilis bcrC</i> in BioBrick format                                                                                                 | This study                            |
| pJNE2E01                              | pBS2E harbouring a transcriptional P <sub>xyIA</sub> - <i>bcrC</i> fusion assembled according to the BioBrick RFC25 cloning standard                         | This study                            |
| pNT2E01                               | pBS2E harbouring P <sub>xyIA</sub> - <i>bceAB</i> assembled according to the BioBrick RFC10 cloning standard                                                 | (9)                                   |
| pMG3Elux1                             | pBS3Elux harbouring a transcriptional P <sub>bceA</sub> - <i>luxABCDE</i> fusion                                                                             | This study                            |
| <b><i>B. subtilis</i> strains</b>     |                                                                                                                                                              |                                       |
| W168                                  | Wild type, <i>trpC2</i>                                                                                                                                      | Laboratory stock                      |
| TMB035 ( $\Delta bceAB$ )             | W168 <i>bceAB::kan</i> ; Kan <sup>r</sup>                                                                                                                    | (7)                                   |
| TMB297 ( $\Delta bcrC$ )              | W168 <i>bcrC::tet</i> ; Tet <sup>r</sup>                                                                                                                     | (7)                                   |
| TMB713 ( $\Delta bceAB \Delta bcrC$ ) | W168 <i>bceAB::kan bcrC::tet</i> ; Kan <sup>r</sup> , Tet <sup>r</sup>                                                                                       | (24)                                  |
| HB13350                               | W168 <i>ytpB::spec</i> ; Spec <sup>r</sup>                                                                                                                   | (14)                                  |
| HB13438                               | W168 <i>menA::kan amyE::P<sub>spac(hy)</sub>-menA</i> ; Kan <sup>r</sup> , Cm <sup>r</sup>                                                                   | (14)                                  |
| SGB73                                 | W168 <i>sacA::pSDlux101</i> ; Cm <sup>r</sup>                                                                                                                | (9)                                   |
| SGB74                                 | W168 <i>sacA::pSDlux102</i> ; Cm <sup>r</sup>                                                                                                                | This study                            |
| SGB218                                | W168 <i>bceAB::kan sacA::pSDlux101 lacA::pNT2E01</i> ; Kan <sup>r</sup> , Cm <sup>r</sup> , Mls <sup>r</sup>                                                 | (9)                                   |
| SGB243                                | W168 <i>lacA::pJNE2E01</i> ; Mls <sup>r</sup>                                                                                                                | This study                            |
| SGB649                                | W168 <i>bcrC::tet sacA::pSDlux101</i> ; Tet <sup>r</sup> , Cm <sup>r</sup>                                                                                   | This study                            |
| SGB677                                | W168 <i>bceAB::kan bcrC::tet sacA::pSDlux101 lacA::pNT2E01</i> ; Kan <sup>r</sup> , Tet <sup>r</sup> , Cm <sup>r</sup> , Mls <sup>r</sup>                    | This study                            |
| SGB681                                | W168 <i>bcrC::tet sacA::pSDlux102</i> ; Tet <sup>r</sup> , Cm <sup>r</sup>                                                                                   | This study                            |
| SGB758                                | W168 <i>sacA::pSDlux101 lacA::pJNE2E01</i> ; Cm <sup>r</sup> , Mls <sup>r</sup>                                                                              | This study                            |
| SGB873                                | W168 <i>menA::kan amyE::P<sub>spac(hy)</sub>-menA ytpB::spec</i> ; Kan <sup>r</sup> , Cm <sup>r</sup> , Spec <sup>r</sup>                                    | This study                            |
| SGB927                                | W168 <i>sacA::pMG3Elux1</i> ; Mls <sup>r</sup>                                                                                                               | This study                            |
| SGB929                                | W168 <i>menA::kan amyE::P<sub>spac(hy)</sub>-menA ytpB::spec sacA::pMG3Elux1</i> ; Kan <sup>r</sup> , Cm <sup>r</sup> , Spec <sup>r</sup> , Mls <sup>r</sup> | This study                            |

|        |                                                                                         |            |
|--------|-----------------------------------------------------------------------------------------|------------|
| SGB974 | W168 <i>sacA</i> ::pSDlux102 <i>lacA</i> ::pJNE2E01; Cm <sup>r</sup> , Mls <sup>r</sup> | This study |
|--------|-----------------------------------------------------------------------------------------|------------|

724 <sup>a</sup> Amp<sup>r</sup>, ampicillin resistance; Cm<sup>r</sup>, chloramphenicol resistance; Kan<sup>r</sup>, kanamycin resistance; Mls<sup>r</sup>,  
 725 macrolide, lincosamide and streptogramin B resistance; Tet<sup>r</sup>, tetracycline resistance, Spec<sup>r</sup>,  
 726 spectinomycin resistance

727

728 **Table 2: Primers used in this study.**

| Name   | Description/use                    | Primer sequences (5'-3' direction) <sup>a</sup>                                                               | Source     |
|--------|------------------------------------|---------------------------------------------------------------------------------------------------------------|------------|
| SG0148 | <i>lacA</i> insertion fwd          | GCATACCGTTGCCGTCATC                                                                                           | This study |
| SG0149 | <i>lacA</i> insertion rev          | GAACTACATGCACTCCACAC                                                                                          | This study |
| SG0506 | <i>amyE</i> insertion fwd          | GTAAGCGTTAACAAAATTCTC                                                                                         | This study |
| SG0507 | <i>amyE</i> insertion rev          | TTATATTGTGCAACACTTCACA                                                                                        | This study |
| SG0528 | <i>sacA</i> insertion up fwd       | CTGATTGGCATGGCGATTGC                                                                                          | (16)       |
| SG0529 | <i>sacA</i> insertion up rev       | ACAGCTCCAGATCCTCTACG                                                                                          | (16)       |
| SG0530 | <i>sacA</i> insertion down fwd     | GTCGCTACCATTACCAGTTG                                                                                          | (16)       |
| SG0531 | <i>sacA</i> insertion down rev     | TCCAAACATTCCGGTGTATC                                                                                          | (16)       |
| SG0630 | <i>ytpB</i> up fwd                 | TCATGTGGACCTGGAAAGCA                                                                                          | (14)       |
| SG0633 | <i>ytpB</i> do rev                 | TGATCGTCCACCGCATTACA                                                                                          | (14)       |
| SG0637 | <i>menA</i> up fwd                 | CCGTACACAAGGATAGGAGA                                                                                          | (14)       |
| SG0640 | <i>menA</i> do rev                 | GAAGGCGAAAGCATCTGACA                                                                                          | (14)       |
| SG0842 | P <sub><i>bceA</i></sub> fwd EcoRI | CAC <b>GAATTC</b> GAACATGTCATAAGCG<br>TGTGACG                                                                 | This study |
| SG0883 | P <sub><i>bceA</i></sub> rev PstI  | CGG <b>ACTGCAG</b> TATCGATGCCCTTCA<br>GCACTTCC                                                                | This study |
| TM0599 | P <sub><i>psdA</i></sub> fwd EcoRI | AGTC <b>GAATTC</b> CACCCCTCGTGAATGT<br>GACAGC                                                                 | This study |
| TM2242 | P <sub><i>psdA</i></sub> rev NotI  | AATT <b>GCGGCCG</b> CCGATAGGTTTCGTT<br>GTTTGCAACACG                                                           | This study |
| TM2731 | <i>bcrC</i> Biobrick fwd           | GATC <b>GAATTC</b> GCGGCCGCTT <b>CTAGA</b><br>AAGGAGGTG <b>GCCGG</b> CTTGA <b>ACTAC</b><br>GAAATTTTTAAAGCAATC | This study |
| TM2732 | <i>bcrC</i> Biobrick rev           | GATC <b>ACTAGT</b> TATTA <b>ACCGGT</b> GAAAT<br>TTTGATCGGTTGGTTTTTC                                           | This study |

729 <sup>a</sup> Sequences in bold highlight restriction sites used for cloning.

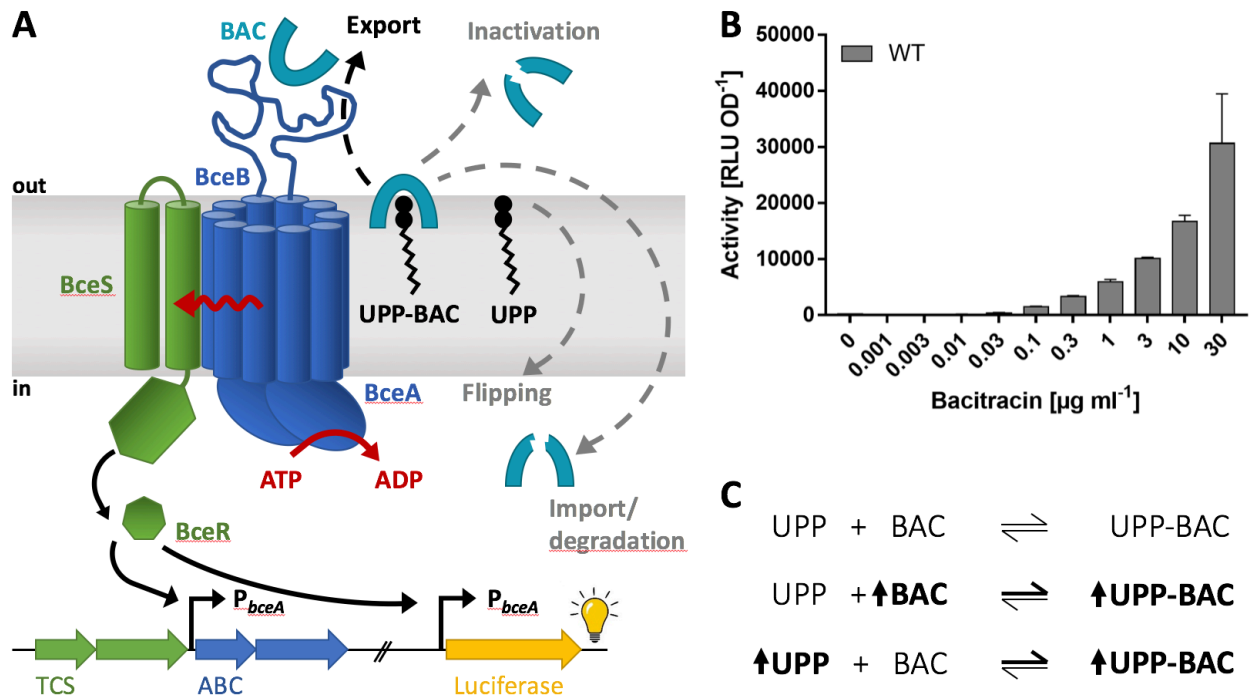

**Fig. 1: Antibiotic resistance and flux-sensing by BceAB.** **A:** Schematic of the BceAB-BceRS resistance system. The transporter BceAB confers resistance against bacitracin (BAC), which acts by binding its cellular target UPP. The different debated mechanisms for resistance by BceAB are indicated by dashed arrows (see text for details). Flux-sensing communicates the transport activity of BceAB to the kinase BceS (red wave arrow), causing activation of BceR, which induces transcription from the target promoter  $P_{bceA}$ . This results in increased production of BceAB, and therefore adjusted levels of resistance. As signalling is directly proportional to BceAB activity, we can use the target promoter  $P_{bceA}$  fused to a luciferase reporter to monitor transport activity. TCS, genes encoding the two-component regulatory system BceRS; ABC, genes encoding the resistance transporter BceAB. **B:** Using luciferase activity as a proxy, BceAB activity of wild-type *B. subtilis* W168 carrying the  $P_{bceA}$ -lux reporter fusion (WT, SGB73) was determined following 25-35 min challenge of exponentially growing cells with sub-inhibitory concentrations of bacitracin. All data are depicted as mean  $\pm$  standard deviation of at least three biological replicates. **C:** Binding reaction between free bacitracin and its cellular target UPP. The change in concentration of UPP-bacitracin complexes (UPP-BAC) through manipulation of either bacitracin or UPP concentrations is indicated by bold font and upward-facing arrows.

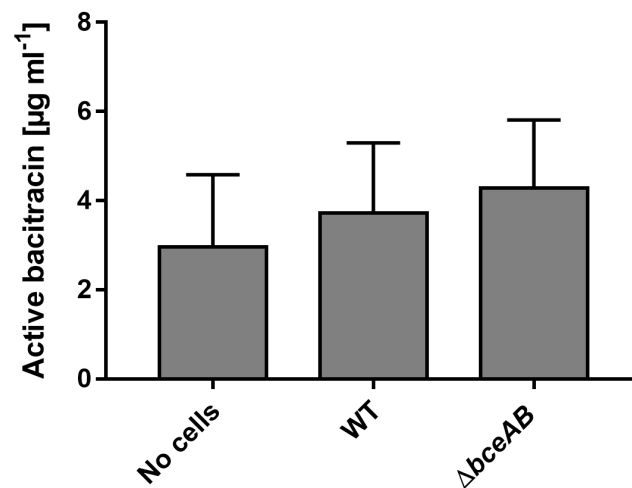

**Fig.2: Bacitracin is neither imported nor inactivated by BceAB.** Cell suspensions of  $\text{OD}_{600} = 10$  of *B. subtilis* W168 (WT) and an isogenic  $\Delta\text{bceAB}$  mutant (TMB035), as well as a buffer control (No cells) were incubated with  $5 \mu\text{g ml}^{-1}$  bacitracin for 30 min. The biologically active bacitracin remaining in the supernatant after incubation was quantified using a bio-assay. Data are shown as mean  $\pm$  standard deviation of at least three biological replicates. One-way ANOVA analysis did not show significant differences between samples.



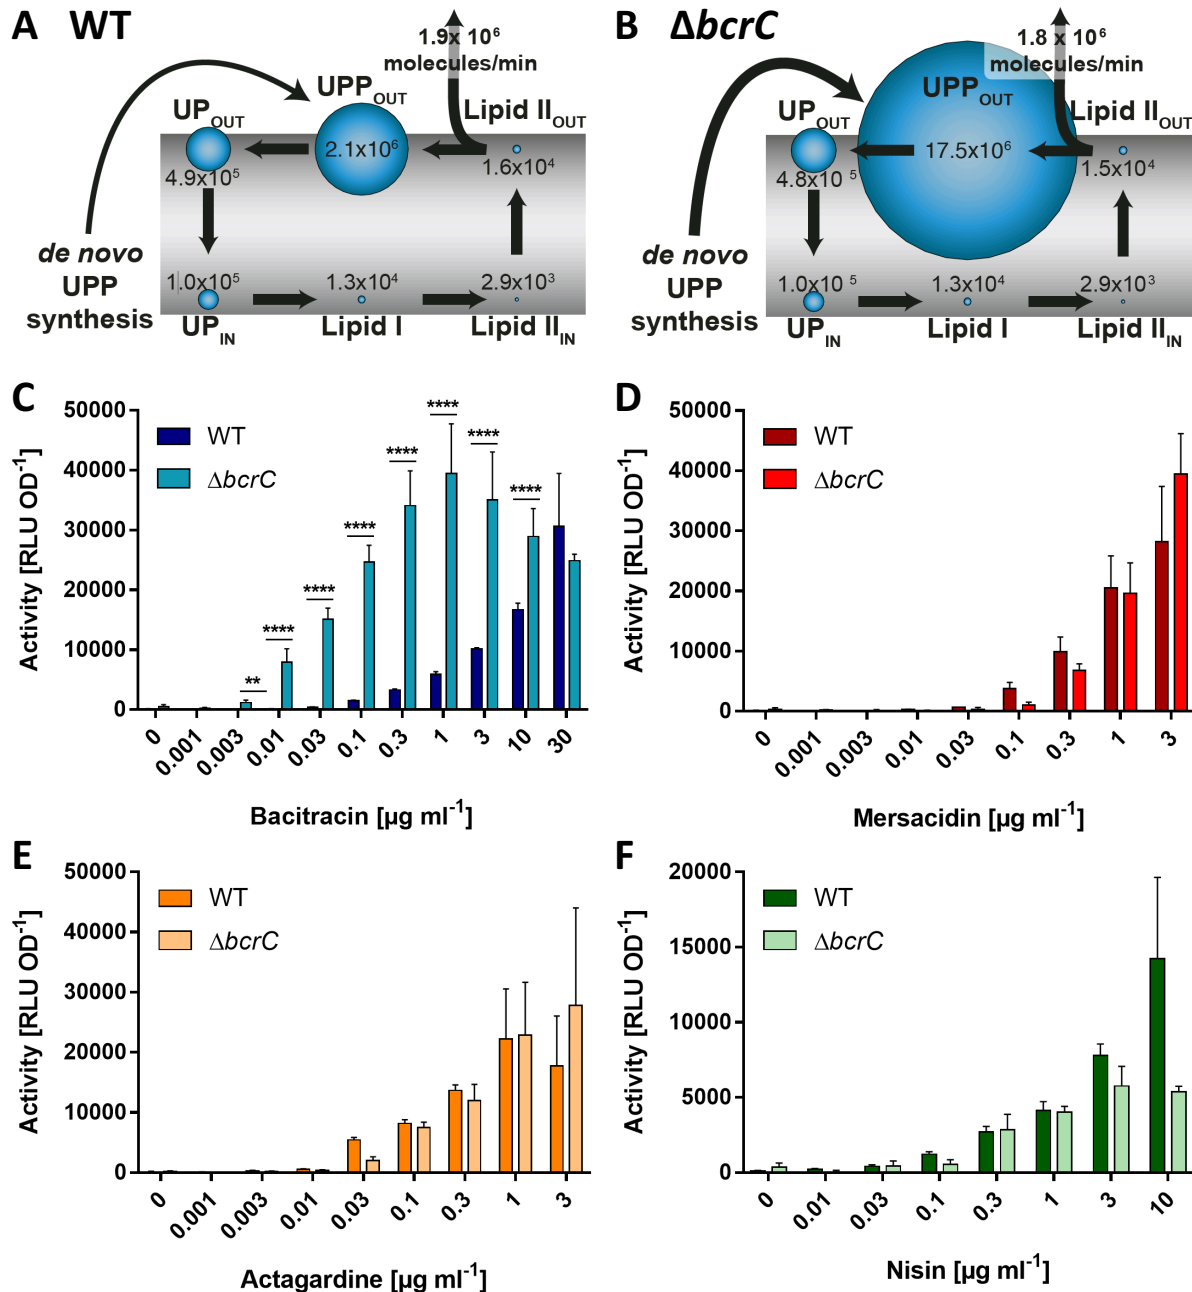

**Fig. 3: Accumulation of UPP increases transport activity at low bacitracin concentrations, but does not affect activity on lipid II binding AMPs.** **A, B:** Pool levels of lipid II cycle intermediates, as predicted by mathematical modelling, are indicated by the relative size of blue bubbles, and numbers of molecules per cell for each intermediate are given. The rate of peptidoglycan (PG) synthesis is shown in molecules of precursor incorporated per minute. The thickness of the arrow for *de novo* UPP synthesis reflects the previously described homeostatic increase in lipid carrier synthesis upon *bcrC* deletion (23). **A**, wild type; **B**, *bcrC* deletion mutant. **C, D, E, F:** Effect of UPP accumulation on transport activity *in vivo*. As a proxy for transport, luminescence activities of  $P_{bceA}$ -*lux* (C, D, E) or  $P_{psdA}$ -*lux* (F) reporter strains were determined 25-35 min following challenge of exponentially growing cells with varying concentrations of AMPs as indicated. Each panel shows the results for one AMP given below the x-axis. Dark bars show results in the wild-type background (SGB73 or SGB74), lighter bars in the isogenic  $\Delta bcrC$  background (SGB649 or SGB681). Data are shown as mean  $\pm$  standard deviation of at least three biological replicates. The increased activity seen in the  $\Delta bcrC$  background compared to wild type was tested for statistical significance using two-sided t-tests with *post-hoc* Bonferroni-Dunn correction for multiple comparisons (\*\*\*\*:  $p < 0.0001$ , \*\*\*:  $p < 0.001$ , \*\*:  $p < 0.01$ , \*:  $0.01 < p < 0.05$ ).

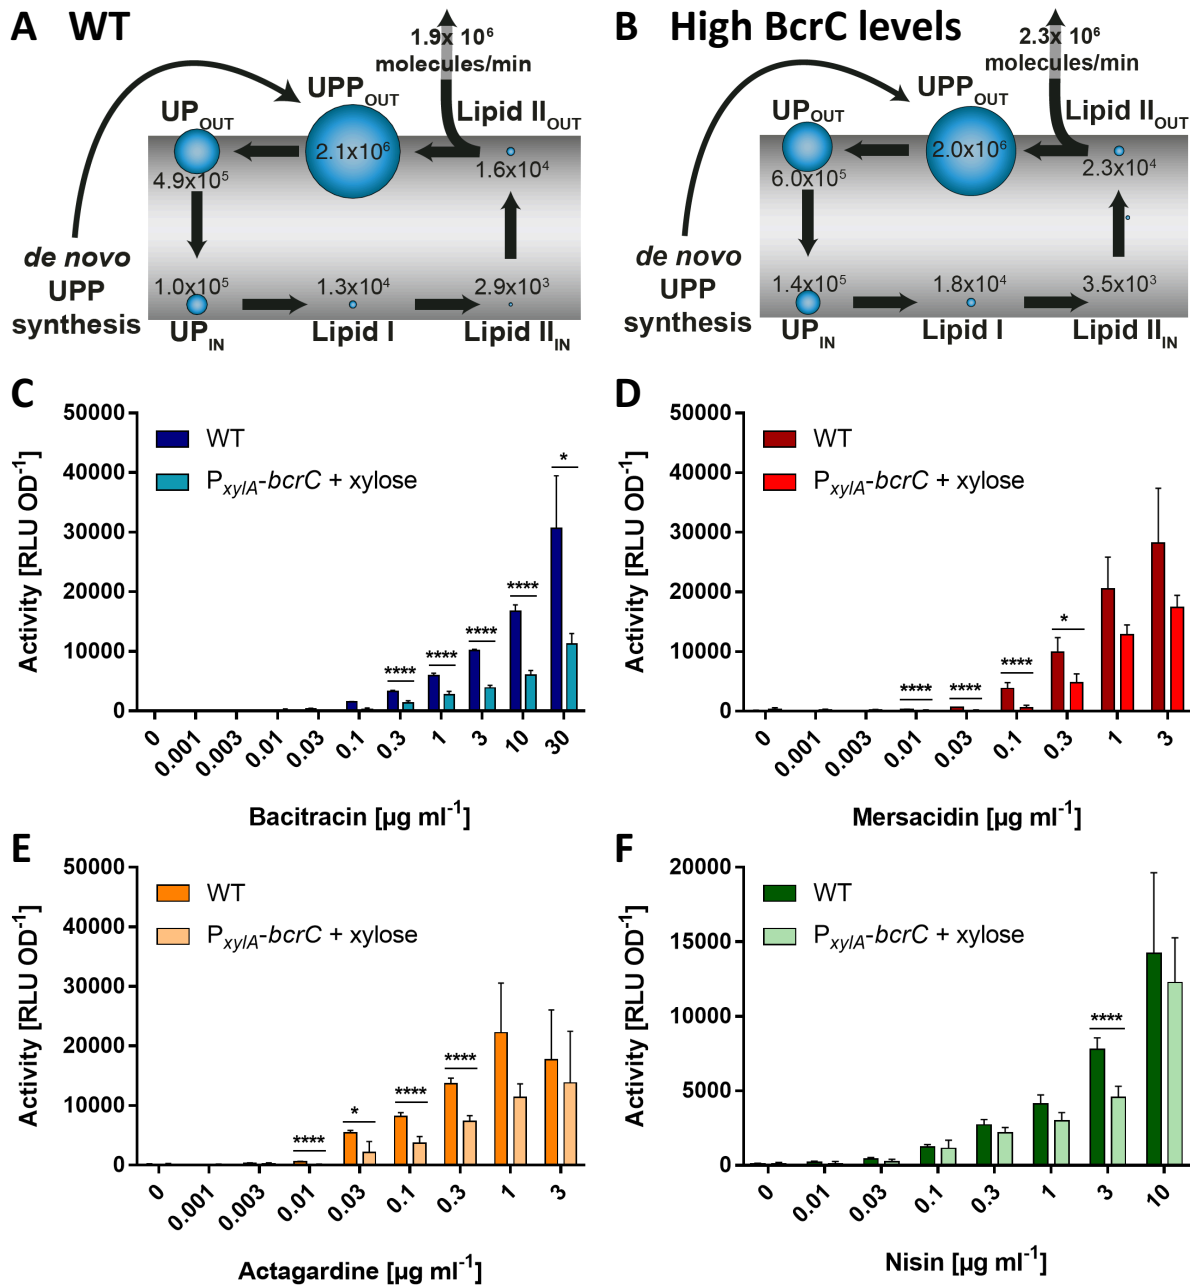

**Fig. 4: Depletion of UPP has a global negative effect on transport. A, B:** Pool levels of lipid II cycle intermediates, as predicted by mathematical modelling, are indicated by the relative size of blue bubbles, and numbers of molecules per cell for each intermediate are given. The rate of peptidoglycan (PG) synthesis is shown in molecules of precursor incorporated per minute. A, wild type; B, BcrC overproduction strain. **C, D, E, F:** Effect of UPP depletion on transport activity *in vivo*. As a proxy for transport, luminescence activities of  $P_{bceA}$ -*lux* (C, D, E) or  $P_{psdA}$ -*lux* (F) reporter strains were determined 25-35 min following challenge of exponentially growing cells with varying concentrations of AMPs as indicated. Each panel shows the results for one AMP given below the x-axis. Dark bars show results in the wild-type background (SGB73 or SGB74), lighter bars in a strain overproducing BcrC (SGB758 or SGB974). Data are shown as mean  $\pm$  standard deviation of at least three biological replicates. Tests for statistical significance of differences in activity in the overproduction versus wild-type backgrounds were done by two-sided t-test with *post-hoc* Bonferroni-Dunn correction for multiple comparisons (\*\*\*\*:  $p < 0.0001$ , \*\*\*:  $p < 0.001$ , \*\*:  $p < 0.01$ , \*:  $0.01 < p < 0.05$ ).

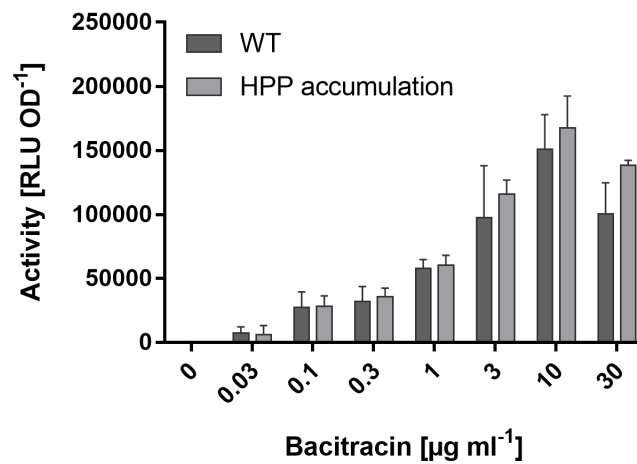

**Fig. 5: Accumulation of HPP does not inhibit BceAB activity.** Transport activities, using luciferase activity of the  $P_{bceA}$ -*lux* reporter as a proxy, were determined for the WT (SGB927, dark grey) and a HPP accumulation strain ( $\Delta ytpB \Delta menA amyE::P_{spac(hy)}-menA$ , SGB929, light grey) grown in MCSE minimal medium, 25-35 minutes following exposure to varying bacitracin concentrations. Data are shown as mean  $\pm$  standard deviation of at least three biological replicates. Two-sided t-tests with *post-hoc* Bonferroni-Dunn correction for multiple comparisons did not show any significant difference between the wild-type and the HPP accumulation strain.

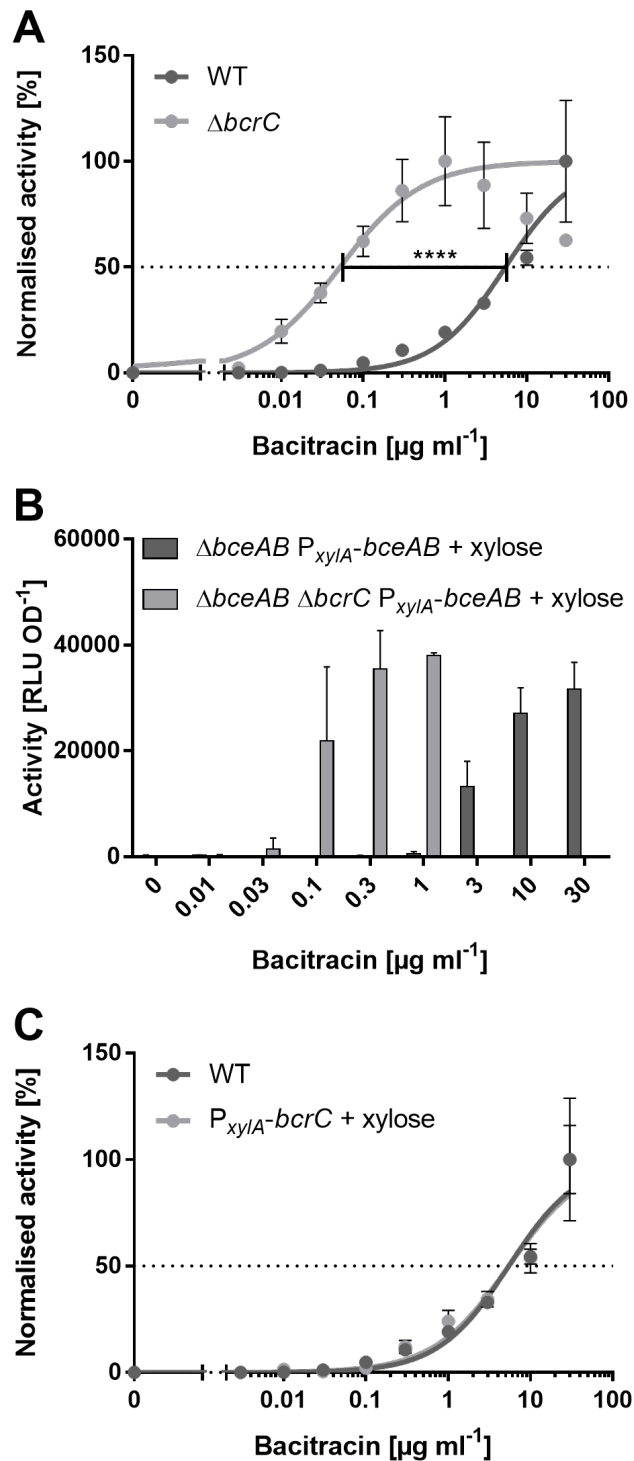

**Fig. S1: Bacitracin dose response behaviour of BceAB.** **A&C:** Bacitracin dose response curves of BceAB activity were fitted on normalised data of the WT (SGB73) and  $\Delta bcrC$  mutant (A, SGB649), or BcrC overproduction strain (C, SGB758). To obtain the best fit of experimental data a non-linear fit with variable slope was chosen. Statistical analyses of the  $\log(\text{EC}_{50})$  values using the in-build non-linear regression comparison of GraphPad Prism7 showed a significant difference between the WT and  $\Delta bcrC$  mutant (\*\*\*\*:  $p < 0.0001$ ), but no difference between WT and BcrC overproduction strain ( $p = 0.73$ ). **B:** BceAB activity was tested in wild-type (SGB218) and  $\Delta bcrC$  strains (SGB677), in which BceAB production was uncoupled from its native regulation. Expression of *bceAB* was induced by addition of 0.2 % (w/v) xylose. All data are shown as mean  $\pm$  standard deviation of at least three biological replicates.
